# Supplementary material for: The positive correlation of TIPRL with LC3 and CD133 contributes to cancer aggressiveness: potential biomarkers for early liver cancer
Source: PubMed Central journal article supplement (PMC6856114; doi:10.1038/s41598-019-53191-5), 2019-11-14
Supplement: 41598_2019_53191_MOESM1_ESM.pdf [file 41598_2019_53191_MOESM1_ESM.pdf]

1 **Supplemental Information**

2

3 **The positive correlation of TIPRL with LC3 and CD133 contributes to cancer**  
4 **aggressiveness: potential biomarkers for early liver cancer**

5

6 Soo Young Jun<sup>1,2,5\*\*</sup>, Su-Jin Jeon<sup>1,2,5\*\*</sup>, Ji-Yong Yoon<sup>1,2</sup>, Jeong-Ju Lee<sup>1,2</sup>, Hyang Ran Yoon<sup>3</sup>,  
7 Min-Hyuk Choi<sup>1,2,5</sup>, Debasish Halder<sup>1,2</sup>, Kwangho Lee<sup>4,5</sup> and Nam-Soon Kim<sup>1,2,5\*</sup>

8 <sup>1</sup>Medical Genomics Research Center, <sup>2</sup>Rare-Disease Research Center, Division of Strategic  
9 Research Groups, <sup>3</sup>Immunotherapy Convergence Research Center, Korea Research  
10 Institute of Bioscience & Biotechnology, Daejeon 34141, Korea

11 <sup>4</sup>Bio and Drug Discovery Division, Korea Research Institute of Chemical Technology, Daejeon,  
12 34114, Republic of Korea.

13 <sup>5</sup>Functional Genomics, University of Science & Technology, Daejeon 34113, Korea

14

15

16

17

18

19

20

21

22

23 **Supplementary Figure 1. Upregulated levels of TIPRL, LC3 and CD133 in HCC tissue.**  
24 **(a-c)** Human HCC tissues (Supplementary Tables 1-2) were stained with the indicated  
25 antibodies followed by confocal observation. Each set comprised of normal and HCC tissues.  
26 **(d)** As a positive control, lung tissue, provided from US Biomax, was simultaneously stained  
27 and presented. DAPI was used for nucleus staining, and scar bar, 100  $\mu\text{m}$ . The Oncomine  
28 database ([www.oncomine.org](http://www.oncomine.org)) was used to determine the mRNA levels of *TIPRL* **(e)** and of  
29 *MAP1LC3A* **(f)** in two different cohorts, Wurbach and TCGA. Statistical significance (\*\*,  
30  $P < 0.01$ ; \*\*\*,  $P < 0.0001$ ) was determined by an unpaired t test with Welch's correction, and the %  
31 differences are shown. (n), the number of samples.

32 **Supplementary Figure 2. TIPRL modulates LC3 and CD133 expression, thereby**  
33 **contributing to tumor aggressiveness.** Huh7 **(a-b, e, g, i)** and SK-Hep-1 **(c-d, f, h, j)** were  
34 cultured in ultra-low affinity plates. Quantitative RT-PCR analyses were performed **(a-d)** using  
35 cells transfected with second siTIPRL and specific primers (Supplementary Table 3). Ectopic  
36 *TIPRL* was dose-dependently overexpressed in siTIPRL- and siCD133-transfected Huh7 **(e,**  
37 **g, i)** and in siTIPRL-SK-Hep-1 **(f, h, j)** cells. **(e, f)** qRT-PCR, **(g, h)** Western blot and **(i, j)** MTT  
38 analyses were performed. For a loading control, GAPDH was used. Statistical significance  
39 (\*\*,  $P < 0.01$ ; \*\*\*,  $P < 0.0001$ ) was calculated by 2way ANOVA. n=4.

40 **Supplementary Figure 3. Diagnostic assessments of TIPRL, LC3, CD133 and the**  
41 **TIPRL/LC3/CD133 models in liver cancers.** **(a-b)** Diagnostic efficacies of TIPRL, LC3,  
42 CD133 and the TIPRL/LC3/CD133 models in liver cancers were calculated using ROC  
43 analysis. AUC, area under the curve.

44 **Supplementary Figure 4. A multivariate Cox hazard regression analysis for the**  
45 **TIPRL/LC3/CD46/CD133/sex model in HCCs.** **(a)** Hazard effect and independency of the  
46 variables, TIPRL, LC3, CD133, CD46, sex (male vs female), on survivability of HCC patients  
47 using XLSTAT were determined by a Cox regression hazard model (upper) and a  
48 proportionality test (lower).

49 **Supplementary Table 1. Clinicopathological features of training set liver cancer tissues.**

50 Human tissues were categorized by patients' information provided by US Biomax. The  
51 average age of patients and numbers of each category are shown.  $\pm$  calculated; % presented.

52 **Supplementary Table 2. Expression levels of TIPRL, LC3 and CD133 as well as**  
53 **clinicopathological information.** Human tissues and patients' information were provided

54 from US Biomax. Tissues were stained with the indicated antibodies, and then confocal  
55 observation was performed. Each expression was quantified using a ZEN 2.3 lite (Carl Zeiss)  
56 program and global normalization.

57 **Supplementary Table 3. Primers used for quantitative RT-PCR.** Primers for conducting  
58 quantitative RT-PCR were designed using Primer 3 program. Each PCR product for the target

59 genes was confirmed as a single band of the expected size on 1.5% agarose gel.

60 **Supplementary Table 4. Clinopathological features of validating set HCC tissues.** A  
61 different set of human tissues were categorized by patients' information provided by US

62 Biomax. The average age of patients and numbers of each category are shown.  $\pm$  calculated; %  
63 presented.

64 **Supplementary Table 5. Levels of TIPRL, LC3, CD133 and CD46 as well as patients'**  
65 **clinicopathological information.** Human tissues and patients' information used in

66 Supplementary Table 4 were provided from US Biomax. Tissues were stained with the  
67 indicated antibodies followed by confocal observation. Each expression was quantified using  
68 a ZEN 2.3 lite (Carl Zeiss) program and global normalization.

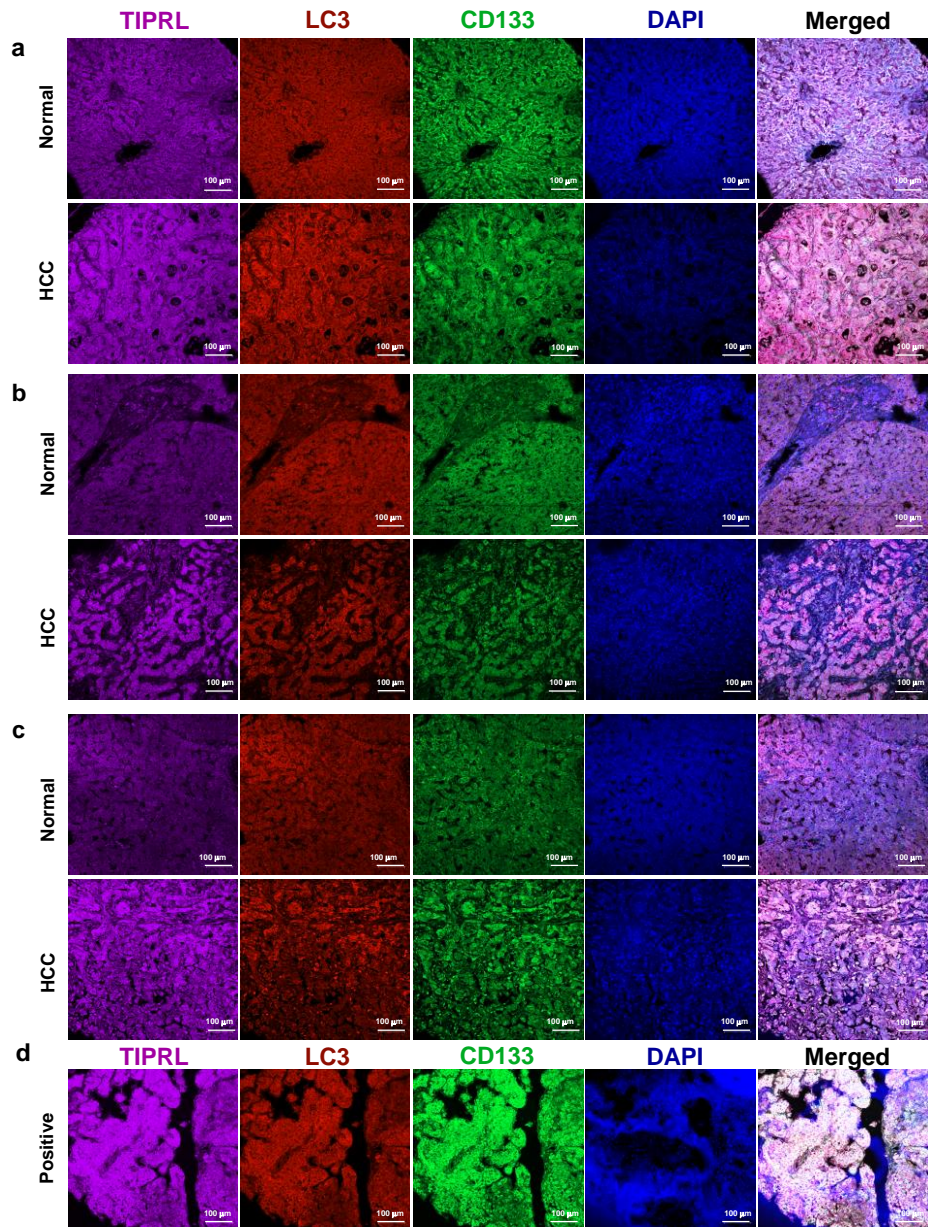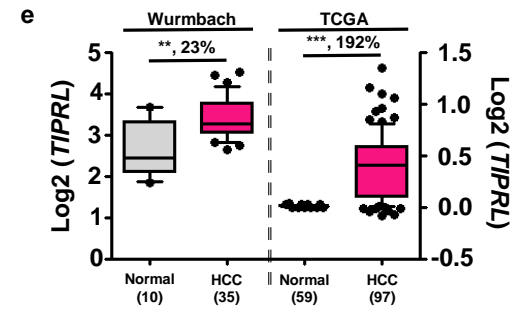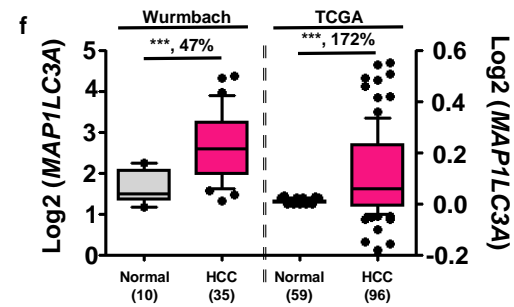

Supplementary Figure 1. Upregulated levels of *TIPRL*, *LC3* and *CD133* in liver cancers

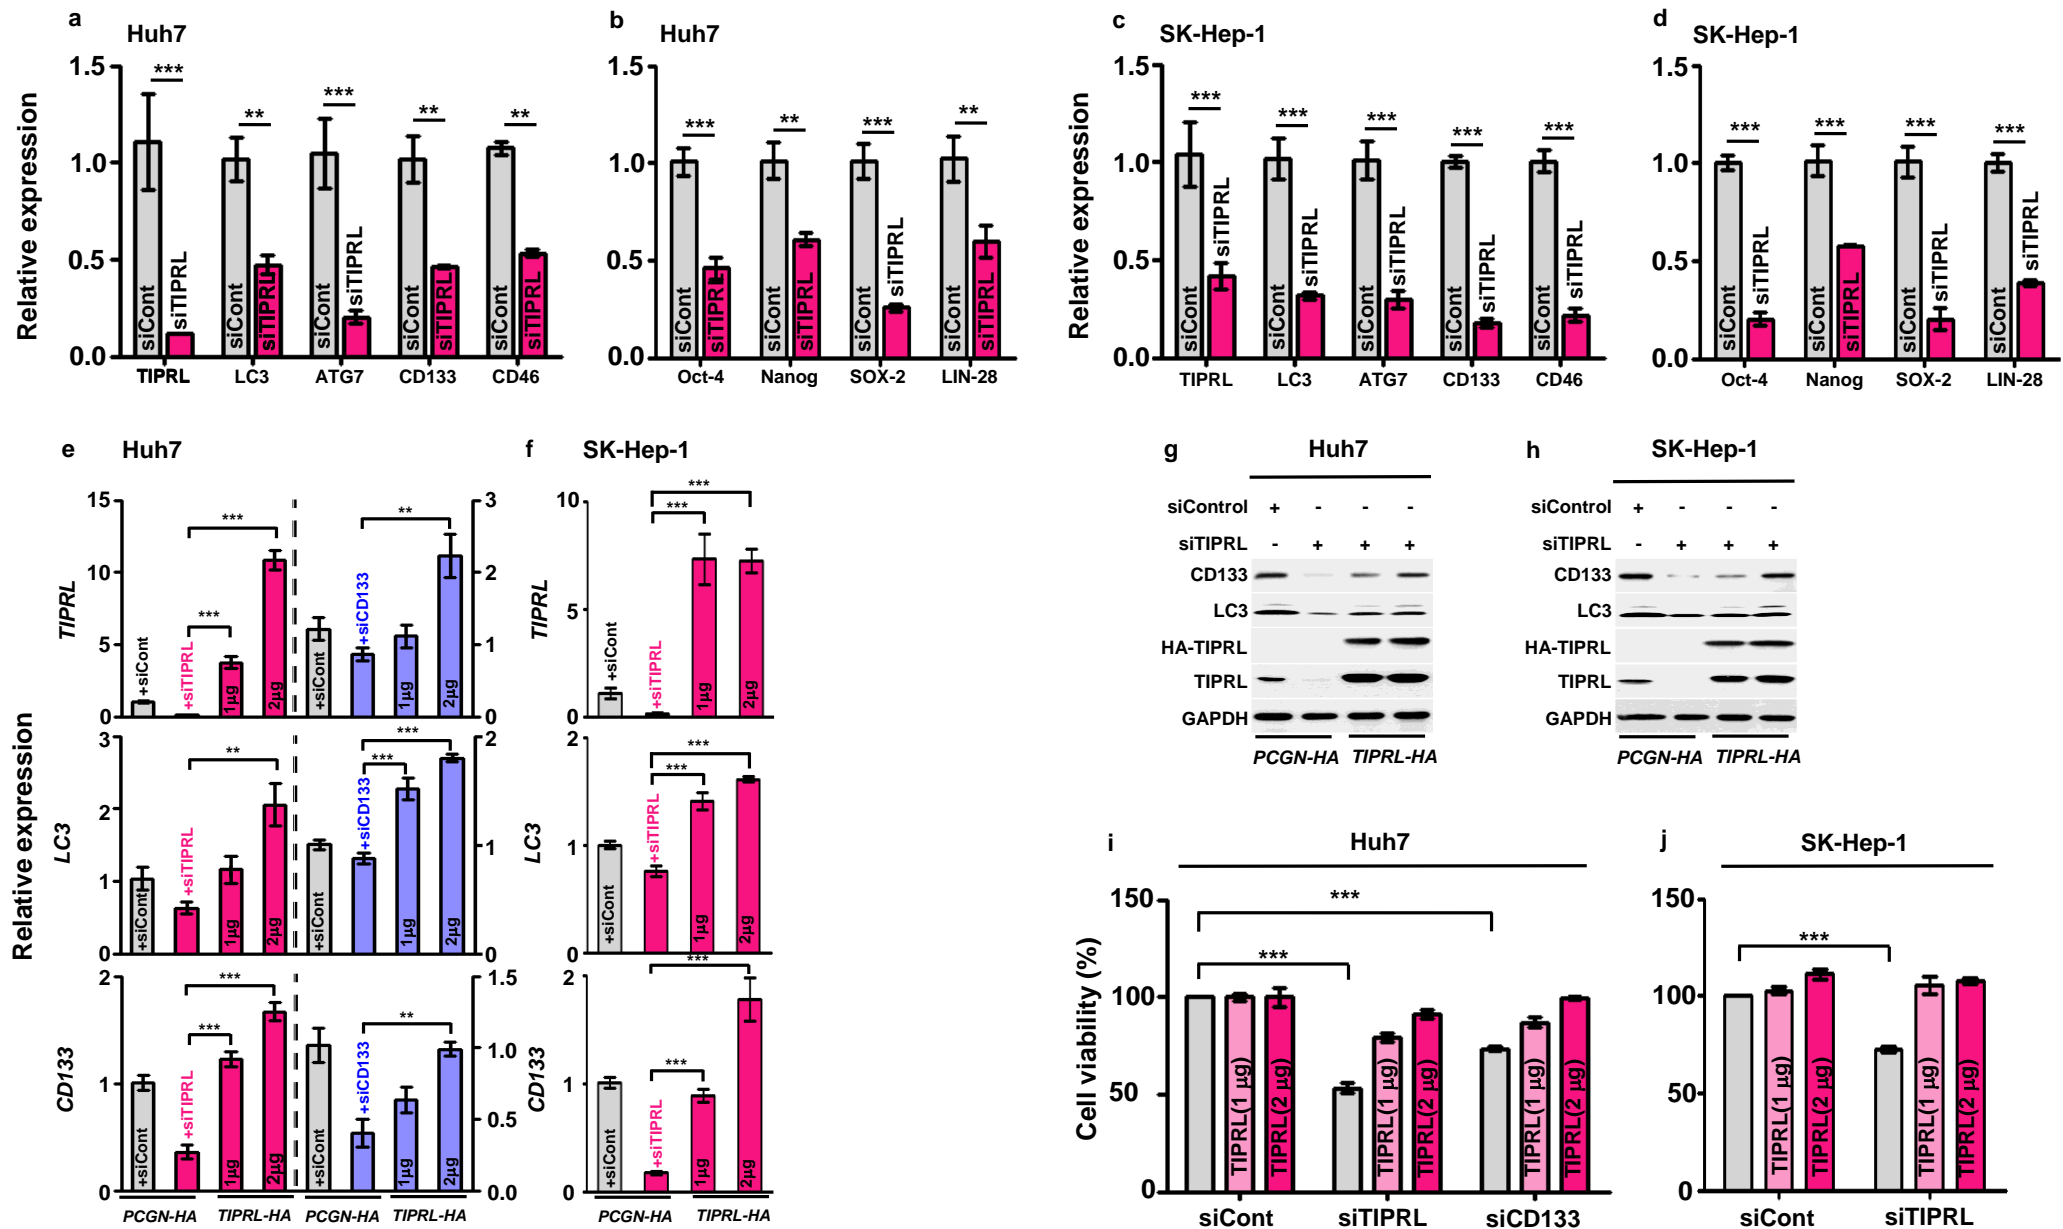

Supplementary Figure 2. TIPRL modulates LC3 and CD133 expression, thereby contributing to tumor aggressiveness.

a

| Liver cancers   | Incidence       |                  |                  |                     |                  |                  |
|-----------------|-----------------|------------------|------------------|---------------------|------------------|------------------|
|                 | AUC (95% CI, %) |                  |                  | cut-off (95% CI, %) |                  |                  |
|                 |                 | Sensitivity      | Specificity      |                     | Sensitivity      | Specificity      |
| TIPRL           | 52%             | 54.2 (48.5-59.9) | 50.0 (27.2-72.8) | -1                  | 9.7 (6.7-13.6)   | 95.0 (75.1-99.9) |
|                 |                 | 51.6 (45.9-57.3) |                  |                     | 30.5 (25.4-36.0) |                  |
| LC3             | 54%             | 59.1 (53.4-64.6) | 55.0 (31.5-76.9) | -0.82               | 18.2 (14.0-23.0) | 95.0 (75.1-99.9) |
|                 |                 | 51.6 (45.9-57.3) |                  |                     | 85.0 (62.1-96.8) |                  |
| CD133           | 51%             | 51.6 (45.9-57.3) | 50.0 (27.2-72.8) | 0.26                | 30.5 (25.4-36.0) | 85.0 (62.1-96.8) |
|                 |                 | 56.8 (51.1-62.4) |                  |                     | 17.5 (13.5-22.3) |                  |
| TIPRL/LC3/CD133 | 53%             | 56.8 (51.1-62.4) | 55.0 (31.5-76.9) | -0.82               | 17.5 (13.5-22.3) | 95.0 (75.1-99.9) |
|                 |                 | 55.0 (31.5-76.9) |                  |                     | 95.0 (75.1-99.9) |                  |

b

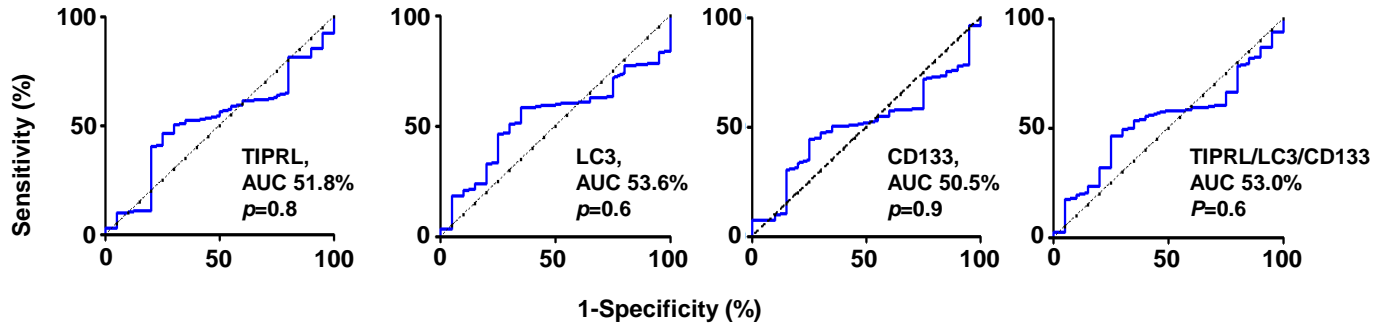

Supplementary Figure 3. Diagnostic assessments of TIPRL, LC3, CD133 and the TIPRL/LC3/CD133 models in liver cancers

a

**Regression coefficients:**

| Predictor Variable   | Hazard Ratio (95%CI) | <i>p value</i> |
|----------------------|----------------------|----------------|
| TIPRL                | 14.224 (0.9-222.5)   | 0.06           |
| LC3                  | 0.021 (0.0-0.5)      | 0.02           |
| CD46                 | 0.876 (0.5-1.5)      | 0.6            |
| CD133                | 2.152 (0.9-5.0)      | 0.08           |
| sex (male vs female) | 5.703 (2.8-11.6)     | <0.0001        |

**Proportionality test:**

| Variable                 | rho       | Chi-square | <i>p value</i> |
|--------------------------|-----------|------------|----------------|
| TIPRL                    | 0.0061795 | 0.0061495  | 0.937495       |
| LC3                      | 0.0111922 | 0.0192947  | 0.889525       |
| CD46                     | 0.0176501 | 0.0378357  | 0.8457733      |
| CD133                    | -0.18377  | 2.4245886  | 0.1194446      |
| sex (male vs female)     | 0.3425474 | 7.2772944  | 0.0069832      |
| TIPRL/LC3/CD46/CD133/sex |           | 12.929882  | 0.0240448      |

**Supplementary Figure 4. A multivariate Cox hazard regression analysis for the TIPRL/LC3/CD46/CD133/sex model in HCCs**
